# Supplementary material for: Genetic and Physiological Characteristics of a Novel Marine Propylene-Assimilating Halieaceae Bacterium Isolated from Seawater and the Diversity of Its Alkene and Epoxide Metabolism Genes
Source: PubMed Central journal article supplement (PMC6440738; doi:10.1264/jsme2.me18053), 2019-01-16
Supplement: 34_33_s1.pdf [file 34_33_s1.pdf]

**Table S1.** Oligonucleotides used in this study.

| <b>Primer name</b> | <b>Sequence (5'-3')</b>                        | <b>References</b>  |
|--------------------|------------------------------------------------|--------------------|
| PE-RT-amoC-F       | TATTGGGTAAAGCCGTGGAAGAGTT                      | This study         |
| PE-RT-amoC-R       | ATGTTGGATACTGCTTCCCCTTGAT                      | This study         |
| PE-RT-EaCoMT-F     | ACGACGAAGCCAATTAATAATCCAGT                     | This study         |
| PE-RT-EaCoMT-R     | ATAGGACTCAACTTTCCGCGAACTC                      | This study         |
| PE-RT-2KPCC-F      | CAGCAGAACTGATGTTGAATCGAGA                      | This study         |
| PE-RT-2KPCC-R      | AACTGCAGTATCACCAGGCTCGTAG                      | This study         |
| PE-RT-RHPCDH-F     | ATCAGTCCGCTATGGAATTACACATT                     | This study         |
| PE-RT-RHPCDH-R     | CTGTGCCCGCTACATCGTCGACACT                      | This study         |
| PE-RT-SHPCDH-F     | GTCAGCAAAGCACTTTCGAATAG                        | This study         |
| PE-RT-SHPCDH-R     | TATTTTCAGAAACGCTGGCAAATCTCC                    | This study         |
| 9F                 | GAGTTTGATCCTGGCTCAG                            | Brosius 1981 (7)   |
| 1510R              | GGTTACCTTGTTACGACTT                            | Weisburg 1991 (41) |
| degenerate-amoC-F3 | TGGGARGARTGGGTIGTIGAYGAYTTYGTI                 | This study         |
| degenerate-amoC-R4 | ICKDATRTRCRTC DATIGTCCA                        | This study         |
| degenerate-amoA-F2 | TGGCCIBTIMRITTYGAYRAYGGI                       | This study         |
| PE-amoCR1          | TGGATACTGCTTCCCCTTGATGTCTATTAATCGAAATTCATTAATG | This study         |
| PE-amoD-F1         | AARTAYGGITGYAARCAYGGIGGITGY                    | This study         |
| PE-ctnD-R5         | IGGIGCIADICCGAICCCIGCDAT                       | This study         |
| PE-seq-F1          | CTTCAAACGACTGGGCTGAGATTGTTCTAG                 | This study         |
| PED-2R4            | CAAGGATTTACGCGTAGGAGATAAGTTAGTAGTACATGGC       | This study         |
| PE-CoM-Nde         | CTATTAATCATATGTCACAAGCTACCCCGCTCATCC           | This study         |
| PE-CoM-Bam         | TAAGATCTGGATCCTTAAGCTAGCTCCGCTCGAACAAT         | This study         |

Table S2 Putative gene products and database similarities of PE-TB08W

| ORF No. | Predictive gene products                                                           | AA  | Protein name and Organism (accession number)                                                           | Identity (%) |
|---------|------------------------------------------------------------------------------------|-----|--------------------------------------------------------------------------------------------------------|--------------|
| ORF1    | DNA binding protein containing Methanogen/methylotroph, DcmR Sensory domain (MEDS) | 243 | DNA binding domain-containing protein, Xaut_4864: <i>Xanthobacter autotrophicus</i> Py2 (YP_001409311) | 31           |
|         |                                                                                    |     | DNA-binding protein, excisionase family: <i>Methylomicrobium album</i> BG8 (ZP_09865456)               | 37           |
| ORF2    | Epoxyalkane:coenzyme M transferase (EaCoMT)                                        | 369 | 2-hydroxypropyl-CoM lyase, Xaut_4865: <i>Xanthobacter autotrophicus</i> Py2 (YP_001409312)             | 66           |
|         |                                                                                    |     | Epoxyalkane:coenzyme M transferase: <i>Haliea</i> sp. ETY-M                                            | 63           |
|         |                                                                                    |     | Epoxyalkane:coenzyme M transferase: <i>Haliea</i> sp. ETY-NAG                                          | 62           |
|         |                                                                                    |     | Epoxyalkane:coenzyme M transferase: <i>Rhodococcus rhodochrous</i> B-276 (AF426826)                    | 46           |
|         |                                                                                    |     | Epoxyalkane:coenzyme M transferase: <i>Mycobacterium chubuense</i> NBB4 (ACZ56343)                     | 45           |
| ORF3    | Hypothetical protein                                                               | 64  | Fumarate lyase, Xaut_4866: <i>Xanthobacter autotrophicus</i> Py2 (YP_001409313)                        | 43           |
| ORF4    | (S)-2-Hydroxypropyl-CoM dehydrogenase (S-HPCDH)                                    | 259 | S-HPCDH, Xaut_4869: <i>Xanthobacter autotrophicus</i> Py2 (YP_001409316)                               | 49           |
|         |                                                                                    |     | S-HPCDH, Xaut_5050: <i>Xanthobacter autotrophicus</i> Py2 (YP_001409484)                               | 49           |
|         |                                                                                    |     | S-HPCDH, Xaut_5073: <i>Xanthobacter autotrophicus</i> Py2 (YP_001409507)                               | 48           |
| ORF5    | Hypothetical protein                                                               | 312 | Hypothetical protein, Xaut_5051: <i>Xanthobacter autotrophicus</i> Py2 (YP_001409485)                  | 59           |
|         |                                                                                    |     | Hypothetical protein, Xaut_5070: <i>Xanthobacter autotrophicus</i> Py2 (YP_001409504)                  | 57           |
|         |                                                                                    |     | Hypothetical protein: <i>Nocardioides</i> sp. JS614 (YP_919264)                                        | 44           |
| ORF6    | Phosphosulfolactate synthase (ComA)                                                | 294 | Phosphosulfolactate synthase, Xaut_4872: <i>Xanthobacter autotrophicus</i> Py2 (YP_001409317)          | 54           |
|         |                                                                                    |     | Phosphosulfolactate synthase, Xaut_5052: <i>Xanthobacter autotrophicus</i> Py2 (YP_001409486)          | 54           |
|         |                                                                                    |     | Phosphosulfolactate synthase, Xaut_5069: <i>Xanthobacter autotrophicus</i> Py2 (YP_001409503)          | 54           |
| ORF7    | Fumarate lyase                                                                     | 510 | Argininosuccinate lyase, Xaut_4873: <i>Xanthobacter autotrophicus</i> Py2 (YP_001409318)               | 43           |
|         |                                                                                    |     | Fumarate lyase, Xaut_5053: <i>Xanthobacter autotrophicus</i> Py2 (YP_001409487)                        | 44           |
|         |                                                                                    |     | Argininosuccinate lyase: <i>Nocardioides</i> sp. JS614 (YP_919267.1)                                   | 35           |
| ORF8    | Fumarate lyase                                                                     | 451 | Fumarate lyase, Xaut_4874: <i>Xanthobacter autotrophicus</i> Py2 (YP_001409319)                        | 47           |
|         |                                                                                    |     | Fumarate lyase, Xaut_5054: <i>Xanthobacter autotrophicus</i> Py2 (YP_001409488)                        | 45           |
|         |                                                                                    |     | Fumarate lyase: <i>Nocardioides</i> sp. JS614 (YP_919284.1)                                            | 43           |
| ORF9    | 1-Aminocyclopropane-1-carboxylate deaminase (ACC)                                  | 337 | ACC deaminase, Xaut_4875: <i>Xanthobacter autotrophicus</i> Py2 (YP_001409320)                         | 49           |
|         |                                                                                    |     | ACC deaminase, Xaut_5055: <i>Xanthobacter autotrophicus</i> Py2 (YP_001409489)                         | 49           |
|         |                                                                                    |     | ACC deaminase: <i>Mycobacterium rhodesiae</i> NBB3 (YP_005000702)                                      | 41           |
| ORF10   | 2-Ketopropyl-CoM oxidoreductase/carboxylase (2-KPCC)                               | 525 | 2-KPCC, Xaut_4867: <i>Xanthobacter autotrophicus</i> Py2 (YP_001409314)                                | 67           |
|         |                                                                                    |     | 2-KPCC, Xaut_5048: <i>Xanthobacter autotrophicus</i> Py2 (YP_001409482)                                | 67           |
|         |                                                                                    |     | Putative 2-ketopropyl-CoM carboxylase: <i>Mycobacterium chubuense</i> NBB4 (ACZ56354)                  | 53           |

|       |                                                       |     |                                                                                                                                                                                                                                                            |                |
|-------|-------------------------------------------------------|-----|------------------------------------------------------------------------------------------------------------------------------------------------------------------------------------------------------------------------------------------------------------|----------------|
| ORF11 | (R)-2-Hydroxypropyl-CoM dehydrogenase (R-HPCDH)       | 250 | <i>R</i> -HPCDH, Xaut_4868: <i>Xanthobacter autotrophicus</i> Py2 (YP_001409483)<br><i>R</i> -HPCDH, Xaut_5049: <i>Xanthobacter autotrophicus</i> Py2 (YP_001409508)<br>Short-chain dehydrogenase/reductase SDR: <i>Nocardioides</i> sp. JS614 (YP_919273) | 64<br>64<br>45 |
| ORF12 | Hypothetical protein                                  | 62  | No similarity                                                                                                                                                                                                                                              | —              |
| ORF13 | Antibiotic biosynthesis monooxygenase                 | 116 | Antibiotic biosynthesis monooxygenase: <i>Bacillus cellulosilyticus</i> DSM 2522 (YP_004095752)<br>Antibiotic biosynthesis monooxygenase: <i>Cyanothece</i> sp. PCC 7425 (YP_002484368)                                                                    | 29<br>35       |
| ORF14 | Hypothetical protein (truncated)                      | 49  | No similarity                                                                                                                                                                                                                                              | —              |
| ORF15 | Hypothetical protein (truncated)                      | 44  | No similarity                                                                                                                                                                                                                                              | —              |
| ORF16 | Hypothetical protein (truncated)                      | 53  | No similarity                                                                                                                                                                                                                                              | —              |
| ORF17 | Hypothetical protein (truncated)                      | 47  | No similarity                                                                                                                                                                                                                                              | —              |
| ORF18 | Hypothetical protein (truncated)                      | 66  | No similarity                                                                                                                                                                                                                                              | —              |
| ORF19 | Alkene monooxygenase $\beta$ -subunit (AmoA)          | 342 | AmoA: <i>Rhodococcus rhodochrous</i> B-276 (BAA07112)<br>Putative propene monooxygenase beta subunit: <i>Mycobacterium chubuense</i> NBB4 (ACZ56350)<br>PmoA: <i>Mycobacterium</i> sp. M156 (AAS19482)                                                     | 43<br>41<br>41 |
| ORF20 | Alkene monooxygenase coupling/effector protein (AmoB) | 100 | AmoB: <i>Rhodococcus rhodochrous</i> B-276 (BAA07113)<br>Putative propene monooxygenase coupling protein: <i>Mycobacterium chubuense</i> NBB4 (ACZ56351)<br>PmoB: <i>Mycobacterium</i> sp. M156 (AAS19483)                                                 | 60<br>58<br>60 |
| ORF21 | Alkene monooxygenase $\alpha$ -subunit (AmoC)         | 505 | AmoC: <i>Rhodococcus rhodochrous</i> B-276 (BAA07114)<br>Putative propene monooxygenase alpha subunit: <i>Mycobacterium chubuense</i> NBB4 (ACZ56352)<br>PmoC: <i>Mycobacterium</i> sp. M156 (AAS19484)                                                    | 68<br>67<br>66 |
| ORF22 | Alkene monooxygenase reductase (AmoD)                 | 344 | AmoD: <i>Rhodococcus rhodochrous</i> B-276 (BAA07115)<br>Putative propene monooxygenase reductase: <i>Mycobacterium chubuense</i> NBB4 (ACZ56353)<br>PmoD: <i>Mycobacterium</i> sp. M156 (AAS19485)                                                        | 56<br>50<br>51 |
| ORF23 | Outer membrane protein W                              | 253 | OmpW family protein: <i>Hahella chejuensis</i> KCTC 2396 (YP_434757)<br>OmpW family protein: <i>Vibrio splendidus</i> LGP32 (YP_002395839)                                                                                                                 | 48<br>46       |
| ORF24 | iSSod13, transposase<br>integrase catalytic subunit   | 273 | iSSod13, transposase: <i>Pseudoalteromonas haloplanktis</i> ANT/505 (ZP_08411520)<br>integrase catalytic subunit: <i>Shewanella</i> sp. MR-7 (YP_737813)                                                                                                   | 85<br>83       |
